# Supplementary material for: Residues 41V and/or 210D in the NP protein enhance polymerase activities and potential replication of novel influenza (H7N9) viruses at low temperature
Source: Springer Nature journal article supplement (doi:10.1186/s12985-015-0304-6), 2015-05-04
Supplement: MOESM1 [file 9770202]

# Additional file 1: Figure S1

↓ I41V

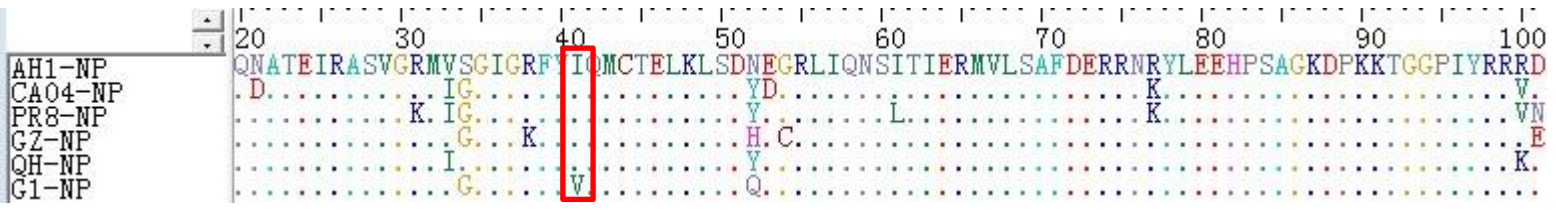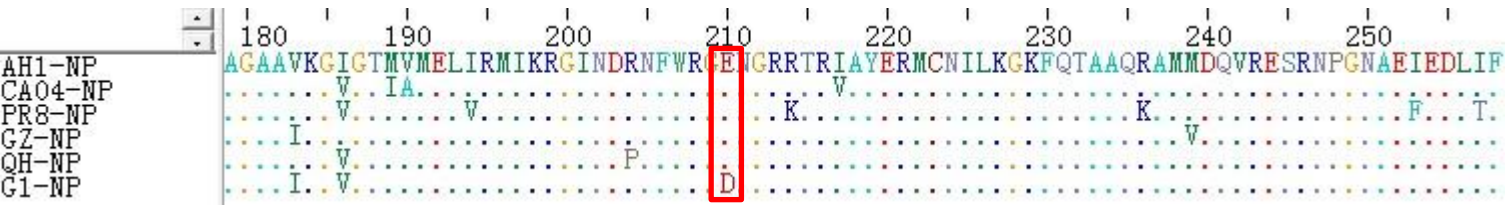

↑ E210D
