# Supplementary material for: Residues 41V and/or 210D in the NP protein enhance polymerase activities and potential replication of novel influenza (H7N9) viruses at low temperature
Source: Springer Nature journal article supplement (doi:10.1186/s12985-015-0304-6), 2015-05-04

# Additional file 2: Figure S2

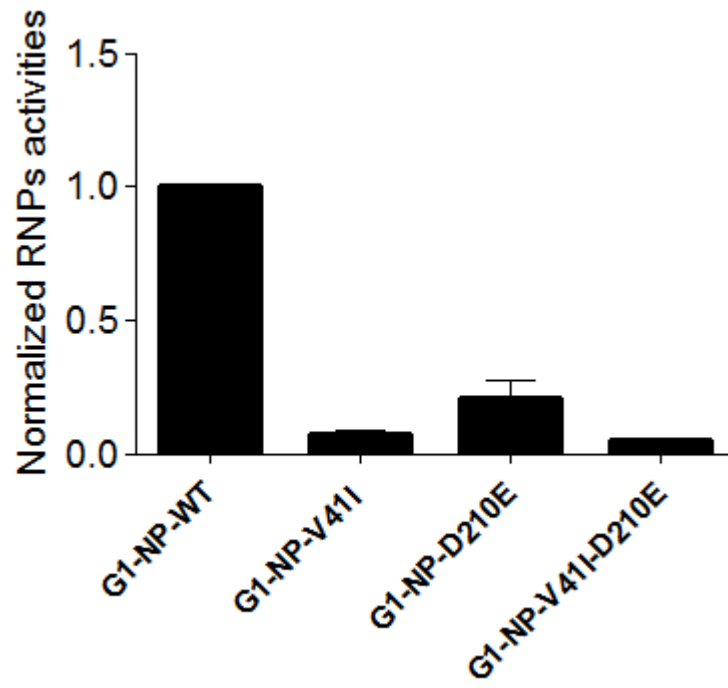

Supplement: MOESM2 [file 9770202]
